# Supplementary material for: Potency and breadth of human primary ZIKV immune sera shows that Zika viruses cluster antigenically as a single serotype
Source: PubMed Central journal article supplement (PMC7213746; doi:10.1371/journal.pntd.0008006), 2020-04-13
Supplement: pntd.0008006.s001.pdf [file pntd.0008006.s001.pdf]

**Supplemental Table 1.** primers used for ZIKV sequencing.

| <b>Name</b> | <b>5' - Sequence - 3'</b> |
|-------------|---------------------------|
| ZV_seqA_s   | ACAGTTCGAGTTTGAAGCG       |
| ZV_seqA_a   | TGTRGTCAGCAGGAGGC         |
| ZV_seqB_s   | TAGGAAGGAGARGAAGAGACG     |
| ZV_seqB_a   | TGTCAAGGTAGGCTTCAC        |
| ZV_seqC_s   | GAGGTRAGATCCTACTGC        |
| ZV_seqC_a   | ACCATCCATCTCAGCCTC        |
| ZV_seqD_s   | AACTCCACACTGGAACAAC       |
| ZV_seqE_s   | GAATGTCCTGGTTCTCAC        |
| ZV_seqE_a   | TAGCCTAGATCACTGTG         |
| ZV_seqF_s   | CTCAAACATAGAGCATGG        |
| ZV_seqF_a   | GTCACCATDGACCTYACTAAG     |
