# Supplementary material for: Potency and breadth of human primary ZIKV immune sera shows that Zika viruses cluster antigenically as a single serotype
Source: PubMed Central journal article supplement (PMC7213746; doi:10.1371/journal.pntd.0008006), 2020-04-13
Supplement: pntd.0008006.s002.pdf [file pntd.0008006.s002.pdf]

**Supplemental Table 2.** Raw P-values for pair wise comparisons of potency/breadth curves (Figure 3b). Cells highlighted in red show serum pairs that differ by  $P < 0.05$  by Bonferroni correction.

| Serum | 11942               | 11981               | 14278               | 12451               | 14137               | 11884               | 12462               | 14236               | 14252               | 14269               | 14276               | 14664               |
|-------|---------------------|---------------------|---------------------|---------------------|---------------------|---------------------|---------------------|---------------------|---------------------|---------------------|---------------------|---------------------|
| 11942 | <del>0.845200</del> | 0.845200            | 0.046900            | 0.968500            | 0.348100            | 0.474500            | 0.000014            | 0.0.000902          | 0.001700            | 0.001700            | 0.438200            | 0.521900            |
| 11981 | 0.845200            | <del>0.161300</del> | 0.161300            | 0.930800            | 0.753600            | 0.287600            | 0.002200            | 0.001100            | 0.001400            | 0.002200            | 0.762500            | 0.449000            |
| 14278 | 0.046900            | 0.161300            | <del>0.114500</del> | 0.114500            | 0.502200            | 0.415900            | 0.000002            | 0.002300            | 0.028400            | 0.021600            | 0.211500            | 0.720800            |
| 12451 | 0.968500            | 0.930800            | 0.114500            | <del>0.514600</del> | 0.514600            | 0.000091            | 0.000091            | 0.000500            | 0.035700            | 0.001700            | 0.437900            | 0.638300            |
| 14137 | 0.348100            | 0.753600            | 0.502200            | 0.514600            | <del>0.826900</del> | 0.826900            | 0.000200            | 0.000700            | 0.010700            | 0.005900            | 0.968100            | 0.861200            |
| 11884 | 0.474500            | 0.287600            | 0.415900            | 0.000091            | 0.826900            | <del>0.000055</del> | 0.000055            | 0.002600            | 0.004600            | 0.003400            | 0.841000            | 0.988400            |
| 12462 | 0.000014            | 0.002200            | 0.000002            | 0.000091            | 0.000200            | 0.000055            | <del>0.000010</del> | 0.000010            | 0.000001            | 0.255700            | 0.040800            | 0.000600            |
| 14236 | 0.0.000902          | 0.001100            | 0.002300            | 0.000500            | 0.000700            | 0.002600            | 0.000010            | <del>0.917100</del> | 0.917100            | 0.255700            | 0.040800            | 0.007000            |
| 14252 | 0.001700            | 0.001400            | 0.028400            | 0.035700            | 0.010700            | 0.004600            | 0.000001            | 0.917100            | <del>0.450200</del> | 0.450200            | 0.093500            | 0.014200            |
| 14269 | 0.001700            | 0.002200            | 0.021600            | 0.001700            | 0.005900            | 0.003400            | 0.255700            | 0.255700            | 0.450200            | <del>0.009900</del> | 0.009900            | 0.009500            |
| 14276 | 0.438200            | 0.762500            | 0.211500            | 0.437900            | 0.968100            | 0.841000            | 0.040800            | 0.040800            | 0.093500            | 0.009900            | <del>0.854600</del> | 0.854600            |
| 14664 | 0.521900            | 0.449000            | 0.720800            | 0.638300            | 0.861200            | 0.988400            | 0.000600            | 0.007000            | 0.014200            | 0.009500            | 0.854600            | <del>0.854600</del> |
