# Supplementary material for: Potency and breadth of human primary ZIKV immune sera shows that Zika viruses cluster antigenically as a single serotype
Source: PubMed Central journal article supplement (PMC7213746; doi:10.1371/journal.pntd.0008006), 2020-04-13
Supplement: pntd.0008006.s003.pdf [file pntd.0008006.s003.pdf]

**Supplemental Table 3.** Summary of variable residues across ZIKV capsid (C), prM, and envelope (E) proteins.

|                       | Capsid |    |    |     | Intergenic |     |     |     |     |     |     | prM |     |     |     |     |     |     | M   |     |     | E   |     |     |     |     |     |     |     |     |     |     |     |     |     |     |     |     |     |     |     |     |     |     |     |     |     |     |     |     |     |     |     |
|-----------------------|--------|----|----|-----|------------|-----|-----|-----|-----|-----|-----|-----|-----|-----|-----|-----|-----|-----|-----|-----|-----|-----|-----|-----|-----|-----|-----|-----|-----|-----|-----|-----|-----|-----|-----|-----|-----|-----|-----|-----|-----|-----|-----|-----|-----|-----|-----|-----|-----|-----|-----|-----|-----|
| Protein position      | 19     | 21 | 74 | 95  | 100        | 101 | 102 | 104 | 107 | 108 | 114 | 1   | 3   | 8   | 17  | 21  | 26  | 29  | 31  | 35  | 36  | 124 | 138 | 140 | 120 | 138 | 153 | 154 | 155 | 156 | 157 | 158 | 159 | 160 | 169 | 227 | 232 | 283 | 285 | 317 | 330 | 335 | 341 | 343 | 345 | 393 | 401 | 406 | 437 | 438 | 473 | 487 | 495 |
| Polyprotein Position  | 25     | 27 | 80 | 101 | 106        | 107 | 108 | 110 | 113 | 114 | 120 | 123 | 125 | 130 | 139 | 143 | 148 | 151 | 153 | 157 | 158 | 246 | 260 | 262 | 410 | 428 | 443 | 444 | 445 | 446 | 447 | 448 | 449 | 450 | 459 | 517 | 522 | 573 | 575 | 607 | 620 | 625 | 631 | 633 | 635 | 683 | 691 | 696 | 727 | 728 | 763 | 777 | 785 |
| Consensus             | S      | F  | I  | K   | A          | D   | T   | V   | V   | G   | A   | A   | V   | S   | S   | E   | P   | L   | M   | Y   | I   | R   | A   | A   | A   | R   | V   | N   | D   | T   | G   | H   | E   | T   | I   | A   | G   | R   | S   | I   | V   | T   | V   | A   | M   | E   | H   | T   | A   | L   | X   | M   | L   |
| Uganda 1947           | N      | L  | .  | R   | .          | .   | .   | I   | I   | .   | .   | .   | I   | .   | .   | K   | A   | .   | V   | H   | V   | K   | V   | V   | T   | .   | -   | -   | -   | -   | .   | Y   | .   | .   | V   | .   | .   | K   | F   | V   | .   | .   | I   | V   | .   | D   | .   | .   | V   | F   | V   | T   | M   |
| Senegal 1984          | N      | L  | .  | R   | .          | .   | .   | I   | .   | .   | .   | .   | I   | .   | .   | K   | A   | .   | V   | H   | V   | K   | V   | V   | T   | .   | .   | .   | .   | .   | .   | .   | .   | .   | V   | .   | .   | .   | F   | V   | .   | .   | .   | .   | .   | D   | .   | .   | V   | F   | V   | T   | M   |
| Nigeria 1968 (A)      | N      | L  | .  | R   | .          | .   | A   | I   | .   | S   | V   | .   | I   | .   | .   | K   | V   | .   | V   | H   | V   | K   | V   | V   | T   | Q   | .   | .   | -   | -   | -   | -   | -   | -   | V   | S   | E   | .   | .   | V   | .   | R   | .   | .   | .   | D   | .   | I   | V   | F   | V   | T   | M   |
| Nigeria 1968 (G)      | N      | L  | .  | R   | .          | .   | A   | I   | .   | S   | V   | .   | I   | .   | .   | K   | V   | .   | V   | H   | V   | K   | V   | V   | T   | .   | .   | .   | -   | -   | -   | -   | -   | -   | V   | S   | E   | .   | .   | V   | .   | R   | .   | .   | .   | D   | .   | I   | V   | F   | V   | T   | M   |
| Malaysia 1966         | .      | .  | .  | .   | .          | .   | .   | .   | .   | .   | .   | V   | .   | .   | .   | .   | .   | .   | V   | .   | .   | .   | .   | .   | .   | .   | .   | .   | .   | .   | .   | .   | .   | .   | .   | .   | .   | .   | .   | .   | .   | .   | .   | .   | .   | D   | Y   | .   | .   | .   | V   | T   | .   |
| Thailand 2013         | .      | .  | .  | .   | T          | .   | .   | .   | .   | .   | .   | .   | .   | .   | .   | .   | .   | .   | .   | .   | .   | .   | .   | .   | .   | .   | .   | .   | .   | .   | .   | .   | .   | .   | .   | .   | .   | .   | .   | .   | .   | .   | .   | .   | .   | .   | .   | .   | .   | M   | .   | .   |     |
| Cambodia 2010         | .      | .  | .  | .   | T          | .   | .   | .   | .   | .   | .   | V   | .   | N   | .   | .   | .   | M   | .   | .   | .   | .   | .   | .   | .   | .   | .   | .   | .   | .   | .   | .   | .   | .   | .   | .   | .   | .   | .   | .   | .   | .   | .   | .   | .   | .   | .   | .   | V   | .   | .   |     |     |
| French Polynesia 2013 | .      | .  | .  | .   | .          | .   | .   | .   | .   | .   | .   | .   | .   | .   | N   | .   | .   | .   | .   | .   | .   | .   | .   | .   | .   | .   | .   | .   | .   | .   | .   | .   | .   | .   | .   | .   | .   | .   | .   | .   | .   | .   | .   | .   | .   | .   | .   | .   | .   | M   | .   | .   |     |
| Puerto Rico 2015      | .      | .  | T  | .   | .          | .   | .   | .   | .   | .   | .   | .   | .   | .   | N   | .   | .   | .   | .   | .   | .   | .   | .   | .   | .   | .   | .   | .   | .   | .   | .   | .   | .   | .   | .   | .   | .   | .   | .   | L   | .   | .   | .   | .   | .   | .   | .   | .   | M   | .   | .   |     |     |
| Brazil 2015           | .      | .  | .  | .   | .          | .   | .   | .   | .   | .   | .   | .   | .   | .   | N   | .   | .   | .   | .   | .   | .   | .   | .   | .   | .   | .   | .   | .   | .   | .   | .   | .   | .   | .   | .   | .   | .   | .   | .   | .   | .   | .   | .   | .   | .   | .   | .   | .   | M   | .   | .   |     |     |
| Colombia 2015         | .      | .  | .  | .   | .          | E   | .   | .   | .   | .   | .   | .   | .   | .   | N   | .   | .   | .   | .   | .   | .   | .   | .   | .   | .   | .   | .   | .   | .   | .   | .   | .   | .   | .   | .   | .   | .   | .   | .   | .   | .   | .   | .   | .   | .   | .   | .   | M   | .   | .   |     |     |     |
| Mexico 2016           | .      | .  | .  | .   | .          | .   | .   | .   | .   | .   | .   | .   | .   | .   | N   | .   | .   | .   | .   | .   | .   | .   | .   | .   | .   | .   | .   | .   | .   | .   | .   | .   | .   | .   | .   | .   | .   | .   | .   | .   | .   | .   | .   | .   | .   | .   | .   | M   | .   | .   |     |     |     |
